CORRECTION

# Correction: Coupled effects of oil spill and hurricane on saltmarsh terrestrial arthropods

Wokil Bam, Linda M. Hooper-Bui, Rachel M. Strecker, Puspa L. Adhikari, Edward B. Overton

The following information is missing from the Data Availability and Acknowledgements sections: This research was made possible by a grant from The Gulf of Mexico Research Initiative. Data are also publicly available through the Gulf of Mexico Research Initiative Information & Data Cooperative at <https://data.gulfresearchinitiative.org> (GRIIDC, doi: [10.7266/N7K935FT](https://doi.org/10.7266/N7K935FT)).

## Reference

1. Bam W, Hooper-Bui LM, Strecker RM, Adhikari PL, Overton EB (2018) Coupled effects of oil spill and hurricane on saltmarsh terrestrial arthropods. PLoS ONE 13(4): e0194941. <https://doi.org/10.1371/journal.pone.0194941> PMID: [29641552](https://pubmed.ncbi.nlm.nih.gov/29641552/)

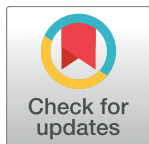

## OPEN ACCESS

**Citation:** Bam W, Hooper-Bui LM, Strecker RM, Adhikari PL, Overton EB (2018) Correction: Coupled effects of oil spill and hurricane on saltmarsh terrestrial arthropods. PLoS ONE 13(6): e0199467. <https://doi.org/10.1371/journal.pone.0199467>

**Published:** June 15, 2018

**Copyright:** © 2018 Bam et al. This is an open access article distributed under the terms of the [Creative Commons Attribution License](https://creativecommons.org/licenses/by/4.0/), which permits unrestricted use, distribution, and reproduction in any medium, provided the original author and source are credited.
